1 **Personalized CZA-ATM dosing against an XDR *E. coli* in liver transplant**  
2 **patients; the application of the *in vitro* hollow fibre infection model**  
3 **(HFIM)**

4 Zahra Sadouki<sup>1, 2, <sup>□</sup></sup>, Emmanuel Q. Wey<sup>2, 3, <sup>□</sup></sup>, Sateesh Iype<sup>4</sup>, David Nasralla<sup>4</sup>, Jonathan Potts<sup>5</sup>,  
5 Mike Spiro<sup>6,7</sup>, Alan Williams<sup>8</sup>, Timothy D. McHugh<sup>2</sup>, Frank Kloprogge<sup>1</sup>

6 1 Institute for Global Health, University College London, UK

7 2 Centre of Clinical Microbiology, University College London, UK

8 3 Department of Infection, Royal Free London NHS Trust, UK

9 4 Department of HPB and Liver Transplant Surgery Royal Free Hospital

10 5 Department of Hepatology, Sheila Sherlock Liver Unit, Royal Free London

11 6 Department of Surgical biotechnology, UCL

12 7 Department of Intensive care medicine Royal Free London

13 8 Department of Infection Sciences, Health Services Laboratories, London, UK,

14

15 <sup>□</sup> Both authors contributed equally

16 **Corresponding author:** Dr Emmanuel Wey, Department of Infection, Consultant and Honorary Associate  
17 Professor in Infection, Royal Free London NHS Trust, Centre for Clinical Microbiology, Division of  
18 Infection & Immunity, University College London

19 [emmanuel.vey@nhs.net](mailto:emmanuel.vey@nhs.net)

20 **Keywords:** XDR *Escherichia coli*, Ceftazidime-Avibactam, Aztreonam, personalised medicine, hollow fibre  
21 infection model

22 **Electronic word count:** 2193 (excluding reference list)

23 **Number of figures:** One main figure, one supplementary figure

24 **Number of tables:** Three supplementary tables

25 **Conflict of interest statement:** No conflicts of interest.

26 **Financial support statement:** This work was conducted as part of Z.S.'s PhD studentship that was  
27 partially funded by an educational grant from Shionogi B.V. and by University College London. FK has  
28 been recipient of a UKRI Medical Research Council Skills Development Fellowship MR/P014534/1, and a  
29 Sir Henry Dale Fellowship jointly funded by the Wellcome Trust and the Royal Society (grant number  
30 220587/Z/20/Z).

31 **Authors contribution statement:** All authors contributed to the inception and planning of the work. ZS<sup>□</sup>  
32 and EW<sup>□</sup> wrote the manuscript and contributed equally, and all authors edited.

## 33 **Abstract**

34 **Background & aims:** An extensively-drug resistant (XDR) NDM and OXA-48 producing *E. coli* contributing  
35 to repeat episodes of biliary sepsis was isolated from the blood stream of a 45-55 year-old male with a  
36 background of IgG4 related sclerosing cholangitis. The patient was awaiting orthotopic liver transplant  
37 (OLT). There is no standardized antibiotic prophylaxis regimen however in line with the Infectious  
38 Diseases Society of America (IDSA) guidance an antibiotic prophylactic regimen of Ceftazidime-  
39 Avibactam (CZA) 2.5g TDS with Aztreonam (ATM) 2g TDS IV was proposed.

40 **Methods:** To inform the individualised pharmacodynamic outcome likelihood prior to prophylaxis dosing  
41 the hollow fibre infection model (HFIM) was applied to simulate the *in vivo* antibiotic exposures of the  
42 CZA-ATM regimen. The HFIM was inoculated with  $\sim 10 \times 10^5$  bacterial CFU/mL of the XDR *E. coli* strain  
43 and CFUs/mL were measured for a total of 120 hours to determine the *in vitro* PK/PD killing dynamics.

44 **Results:** A 4-log reduction in CFU/mL in the first ten hours of the regimen exposure was observed  
45 however the killing dynamics were slow and six eight-hourly infusions were required to reduce bacterial  
46 cells to below the limit of quantification. Thus, the HFIM supported the use of the regimen for infection  
47 clearance however highlighted the need for several infusions. Standard local practise is to administer  
48 prophylaxis antibiotics at induction of OLT however the HFIM provided data to rationalise earlier dosing  
49 therefore the patient was dosed at 24 hours prior to their OLT induction. The patient was subsequently  
50 discharged 8 days after surgery.

51 **Conclusions:** The HFIM provides a dynamic culture solution for informing individualised medicine by  
52 testing antibiotic combinations and exposures against the bacterial isolates cultured from the patient's  
53 infection.

## 54 **Introduction**

55 Antibiotic prophylaxis in the perioperative period is the standard of care and routinely prescribed during  
56 surgical procedures including solid organ transplantation (SOT). Although evidence suggests an overall  
57 benefit in reducing postoperative infections the standard of care regimen and duration vary between  
58 transplant centres<sup>1-3</sup>. Here we present the application of the Hollow Fibre Infection Model (HFIM) to  
59 inform perioperative personalised antimicrobial dosing in a complex clinical setting. It is anticipated that  
60 antimicrobial combination therapy will require case-by-case based selection, accounting for individual  
61 risk factors and local patterns of resistance, given the rising incidence of multi drug resistant infections  
62 in solid organ transplant donors and recipients. Systematic reviews and meta-regression analysis has  
63 indicated that there is statistically significant risk associated with gastrointestinal-tract colonisation of  
64 carbapenem resistant enterobacterales (CRE) and subsequent infection with CRE<sup>4</sup>. Informing  
65 personalised dosing requires *in vitro* testing beyond MIC reporting which for XDR and PDR infections  
66 only serves to highlight the limited options of antimicrobials<sup>5</sup>. In these contexts, HFIM provides an *in*  
67 *vitro* tool which can inform perioperative dosing. The semi permeable hollow fibres retain the bacteria  
68 in the extra capillary space (ECS) whilst allowing for flow of nutrients and drugs. Therefore, the bacteria  
69 isolated from the patient can be challenged against dynamic *in vivo* mimicking antimicrobial exposures  
70 to investigate bacterial PD<sup>6</sup>.

## 71 **Materials/Patients and methods**

### 72 **Information on clinical findings and diagnostic assessment**

73 An inpatient 45-55 year-old male at University College London Hospitals NHS Foundation Trust (UCLH),  
74 also under the care of Hepatology and Hepatobiliary surgery teams at Royal Free London NHS  
75 Foundation Trust (RFL), previously diagnosed with IgG related sclerosing cholangitis<sup>4</sup> presented with  
76 recurrent biliary sepsis over a three-month period. Source control of the infections was not achieved by  
77 empirical antibiotic treatment due to the presence of three metallic stents in his biliary tree and an  
78 internalised percutaneous biliary drain. Blood culture samples and testing of the perihepatic collection  
79 fluid confirmed several MDR NDM, and OXA-48 positive gram-negative bacterial strains (Supplementary  
80 Table 3) with a combined resistance across nine major antibiotic classes. Further complicating the  
81 patient's clinical management was the damage to the liver and loss of synthetic function therefore at  
82 the time the patient was placed on the NHS waiting list for orthotopic liver transplantation (OLT). The  
83 Infectious Diseases Society of America (IDSA) guidance on the treatment of antimicrobial-resistant gram-

84 negative infections particularly MBL-producing CRE (e.g., NDM, IMP, VIM) suggests intravenous three  
85 times daily dosing of 2.5g Ceftazidime-Avibactam (CZA) in addition to 2g aztreonam (ATM)<sup>7</sup>. In addition,  
86 several clinical infectious disease publications report efficacy of CZA plus ATM in patients with BSIs<sup>8-10</sup>.  
87 Further antibiotic susceptibility testing (AST) revealed CZA-ATM synergy where ATM activity was  
88 restored when in combination with AVI (Supplementary Table 1). Therefore, the HFIM was employed as  
89 a proof of concept to simulate the *in vivo* dynamic concentrations of the proposed treatment of a three-  
90 way antibiotic dosing regimen to be administered to a clinically complex patient.

## 91 **Laboratory consumables and experimental setup**

92 The laboratory control strain (ATCC 25922<sup>®</sup>) and the clinical isolate (XDR *E. coli*) were prepared  
93 identically. Each were cultured at 37°C in ambient air on nutrient agar and cryopreserved in Microbank™  
94 beads at -80°C. MICs were determined following CLSI guidelines for microbroth dilution<sup>11</sup>. A mid-log  
95 phase inoculum for each isolate was prepared for the HFIM by refreshing a fresh overnight culture  
96 incubated in a shaking incubator at 200 rpm and 37°C in cation adjusted Mueller Hinton broth (CAMHB;  
97 Sigma, UK). A 1:50 dilution from this culture was performed to inoculate the HFIM ECS, achieving a final  
98 bacterial load of 10<sup>5</sup> CFU/mL in the ECS.

99 The R-Shiny web application promoted by The International Society of Anti-Infective Pharmacology  
100 (ISAP) and ESCMID PK/PD of anti-infectives study group (EPASG) was used to define experimental setup  
101 parameters<sup>12</sup>. The following C<sub>max</sub> concentrations were mimicked; CAZ 80 µg/L, AVI 14 µg/L, ATM 120  
102 µg/L. A T<sub>½</sub> of 2.48 hours was simulated in the HFIM. Antibiotic powders were dissolved in solvents  
103 recommended by the manufacturers (CAZ; Sigma, AVI; MCE and ATM; TOKU-E).

104 CAMHB (Sigma; UK) was broth media used in the HFIM system. The hollow fibre cartridge was sourced  
105 from FibreCell systems (High flux PS, C2011). The FibreCell duet pump was set at 100 mL/min to allow  
106 the cartridge and central reservoir to reach equilibrium. A peristaltic pump (Minipuls evolution®, Gilson)  
107 was set at 0.699 mL/min to mimic T<sub>½</sub> of 2.48. The syringe driver pumps (AL-1000, WPI) were  
108 programmed to automatically dose 2 mL infusions every 8 hours over 2 hours and 1 hour respectively  
109 for CZA and ATM, administration was concurrent and direct into the central reservoir. Dosing timepoints  
110 were at 0, 8, 16, 24, 32, 40, 48, 56, 64, 72, 80, 88, 96, 104 and 112.

111 The cartridge ECS was sampled on Mueller Hinton agar (MHA) (VWR; UK) to quantify CFUs as well as on  
112 colombia blood agar (VWR; UK) to confirm the absence of contamination. The experiment with the  
113 laboratory control strain (ATCC 25922<sup>®</sup>) and the clinical isolate (XDR *E. coli*) were both performed in

114 biological duplicate and all bacterial CFU/mL measurements were performed in technical duplicates at  
115 timepoints 0, 2, 4, 6, 8, 10 to capture the initial killing dynamics then again, every 24 hours for five days  
116 to capture sustained killing or re-growth.

## 117 Results

118 MICs demonstrated synergy between ATM-AVI against the XDR *E. coli* isolated from the patients' blood  
119 stream. MICs were as follows CAZ; >80, AVI; >14, ATM; >120, CZA; >32/4, ATM-AVI; 2/4 and CZA-ATM;  
120 2.5/0.44/3.8. Although CLSI and EUCAST are yet to establish breakpoints for the ATM-AVI combination,  
121 this MIC and synergy data seen fell within range of previous *in vitro* studies reporting MICs between  
122  $\leq 0.03/4$  and  $8/4$   $\mu\text{g/mL}$ , most typically  $\leq 2/4$   $\mu\text{g/mL}$  for MBL-producing Enterobacterales<sup>13,14</sup>.

123 The XDR *E. coli* challenged with CZA-ATM combination therapy infusions produced a steady rate of  
124 killing for the first 10 hours with a 4-log reduction in bacterial CFU/mL however six eight-hourly infusions  
125 were required to reduce bacterial cells to below the limit of quantification (Figure 1). Therefore, multiple  
126 infusions were required to achieve bacterial source control. The HFIM data demonstrated the proposed  
127 combination therapy was only effective at clearing the XDR *E. coli* after two days of administration of  
128 eight hourly infusions. Thus, this suggests longer extended infusions or earlier administration of  
129 prophylaxis would be necessary for this patient as towards the end of the infusion the simulated  
130 concentration of both ATM and CAZ drop below their respective MICs.

131 In general clamping of the inferior vena cava occurs at two to three hours after induction followed by  
132 anhepatic period from three to four hours post induction of the OLT during which the mobilisation and  
133 explantation of the native Liver takes place. It would be at this point when and mobilisation and removal  
134 of the primary prosthetic sources of XDR biofilm would take place. Surgical implantation of the new  
135 deceased donor graft would therefore theoretically coincide with the MIC nadir and potential  
136 bacteraemia resulting from explantation of the native liver and if the first dose were given at induction it  
137 would also coincide a CFU/mL load above the LOD. This informed the patients antibiotic prophylaxis,  
138 and Ceftazidime avibactam 2.5g iv and Aztreonam 2g IV were first dosed at 12 hours prior to the  
139 anhepatic phase of their OLT induction thus different to the standard local practise of administering  
140 prophylaxis antibiotics at induction of OLT 8-hourly for a total period of 48 hours. The patient received  
141 a DCD graft with side-to-side piggyback anastomosis and portal vein end-to-end anastomosis and Roux-  
142 en-Y Hepaticojejunostomy with removal of a previously internalised percutaneous biliary drain.

143 The patient was discharged 8 days after surgery and had no reoccurrence of XDR *E. coli* infection  
144 reported in the year after follow up. Incidentally, the patient has also remained CRE negative on  
145 screening post OLT.

## 146 **Conclusions**

147 Several attempts have been made to develop *in vitro* laboratory susceptibility testing methods for the  
148 combination of CZA with ATM against XDR GNB<sup>15-17</sup>. However, these methods test static antibiotic  
149 concentrations. Here we challenged a patient XDR BSI isolate against dynamic *in vivo* simulated  
150 concentrations of the CZA-ATM antibiotic combination. The HFIM data demonstrated the CZA-ATM  
151 antibiotic regimen was effective at clearing the bacterial cells below the limit of detection in the hollow  
152 fibre ECS however multiple infusions were required. The Royal Free London Trust standard of care is to  
153 administer prophylactic antibiotics for orthotopic liver transplant (OLT) at induction<sup>3</sup>. However, the slow  
154 killing dynamics observed in the HFIM provided *in vitro* evidence to support prophylactic administration  
155 prior to OLT as well as an extended prophylactic duration of 48-hours. Therefore, the patient awaiting a  
156 liver transplant was dosed 12 hours earlier than standard local practice. The patient was subsequently  
157 discharged 8 days after OLT. The unpredictability relating to the timing and lead times associated with  
158 deceased donor grafts offers complicates the practicality of commencing antibiotic prophylaxis in this  
159 patient cohort far in advance of 12 hours. This is compounded by the requirement to administer both  
160 ceftazidime-avibactam and aztreonam concomitantly.

161 The increased application of alternative synergistic combinations of antibiotic agents necessitates  
162 improved methodologies and approaches of *in vitro* evaluation of combination regimens. We  
163 demonstrate extended prophylaxis periods are superior for a chronically infected patient where source  
164 control has not been achieved with conventional antibiotic treatment and alternative combination  
165 regimens are used. The need of standardized methods to support personalised medicine will be  
166 increased as the antibiotic resistance era heightens. The HFIM provides a solution to testing different  
167 antibiotic regimens against the exact bacterial isolate cultured from the patient. Specific PK  
168 concentration profile of the proposed antibiotics can be mimicked. The increased prescribing of  
169 alternative synergistic combinations necessitates improved *in vitro* methodology for evaluating  
170 personalized dosing. The HFIM provides a dynamic culture solution for testing personalized antibiotic  
171 regimens and exposures against the bacterial isolates cultured from the patient. This could inform  
172 targeting therapy which could preserve antimicrobials and uphold antimicrobial stewardship.

## 173 **Informed consent**

174 The patient was consented for Orthotopic liver transplantation and normothermic perfusion as is  
175 standard for all patients and includes consent for Research publications of outcomes and the use of  
176 peri-transplant tissue samples for research. In this case no patient or deceased donor tissue was used in  
177 vitro testing.

## 178 **References**

- 179 1. Anesi, J. A., Blumberg, E. A. & Abbo, L. M. Perioperative Antibiotic Prophylaxis to Prevent  
180 Surgical Site Infections in Solid Organ Transplantation. *Transplantation* **102**, 21–34 (2018).
- 181 2. Abbo, L. M. & Grossi, P. A. Surgical site infections: Guidelines from the American Society  
182 of Transplantation Infectious Diseases Community of Practice. *Clin Transplant* **33**, (2019).
- 183 3. Campos-Varela, I. *et al.* What is the optimal antimicrobial prophylaxis to prevent  
184 postoperative infectious complications after liver transplantation? A systematic review of  
185 the literature and expert panel recommendations. *Clin Transplant* **36**, e14631 (2022).
- 186 4. Willems, R. P. J. *et al.* Incidence of infection with multidrug-resistant Gram-negative  
187 bacteria and vancomycin-resistant enterococci in carriers: a systematic review and meta-  
188 regression analysis. *Lancet Infect Dis* **23**, 719–731 (2023).
- 189 5. Gajic, I. *et al.* Antimicrobial Susceptibility Testing: A Comprehensive Review of Currently  
190 Used Methods. *Antibiotics* **11**, (2022).
- 191 6. Sadouki, Z. *et al.* Application of the hollow fibre infection model (HFIM) in antimicrobial  
192 development: a systematic review and recommendations of reporting.  
193 doi:10.1093/jac/dkab160.
- 194 7. IDSA Guidance on the Treatment of Antimicrobial-Resistant Gram-Negative Infections:  
195 Version 1.0. <https://www.idsociety.org/practice-guideline/amr-guidance/>.
- 196 8. Falcone, M. *et al.* Efficacy of Ceftazidime-avibactam Plus Aztreonam in Patients With  
197 Bloodstream Infections Caused by Metallo- $\beta$ -lactamase-Producing Enterobacterales.  
198 *Clinical Infectious Diseases* **72**, 1871–1878 (2021).

- 199 9. Yasmin, M. *et al.* Monitoring Ceftazidime-Avibactam and Aztreonam Concentrations in the  
200 Treatment of a Bloodstream Infection Caused by a Multidrug-Resistant Enterobacter sp.  
201 Carrying Both Klebsiella pneumoniae Carbapenemase-4 and New Delhi Metallo- $\beta$ -  
202 Lactamase-1. *Clin Infect Dis* **71**, 1095 (2020).
- 203 10. Falcone, M. *et al.* Efficacy of Ceftazidime-avibactam Plus Aztreonam in Patients With  
204 Bloodstream Infections Caused by Metallo- $\beta$ -lactamase-Producing Enterobacterales.  
205 *Clinical Infectious Diseases* **72**, 1871–1878 (2021).
- 206 11. CLSI. *M100 | Performance Standards for Antimicrobial Susceptibility Testing, 33rd Edition.*  
207 (2023).
- 208 12. HF-App. [https://varacli.shinyapps.io/hollow\\_fiber\\_app/](https://varacli.shinyapps.io/hollow_fiber_app/).
- 209 13. Lutgring, J. D. *et al.* Antibiotic Susceptibility of NDM-Producing Enterobacterales Collected  
210 in the United States in 2017 and 2018. *Antimicrob Agents Chemother* **64**, (2020).
- 211 14. Chauzy, A. *et al.* Pharmacodynamic modelling of  $\beta$ -lactam/ $\beta$ -lactamase inhibitor  
212 checkerboard data: illustration with aztreonam-avibactam. *Clinical Microbiology and*  
213 *Infection* **25**, 515–516 (2019).
- 214 15. Rawson, T. M. *et al.* A practical laboratory method to determine ceftazidime-avibactam-  
215 aztreonam synergy in patients with New Delhi metallo-beta-lactamase (NDM)-producing  
216 Enterobacterales infection. *J Glob Antimicrob Resist* **29**, 558–562 (2022).
- 217 16. Sreenivasan, P. *et al.* In-vitro susceptibility testing methods for the combination of  
218 ceftazidime-avibactam with aztreonam in metallo-beta-lactamase producing organisms:  
219 Role of combination drugs in antibiotic resistance era. *The Journal of Antibiotics* 2022 **75**:8  
220 **75**, 454–462 (2022).
- 221 17. Khan, A. *et al.* Evaluation of susceptibility testing methods for aztreonam and ceftazidime-  
222 avibactam combination therapy on extensively drug-resistant gram-negative organisms.  
223 *Antimicrob Agents Chemother* **65**, (2021).

224

225



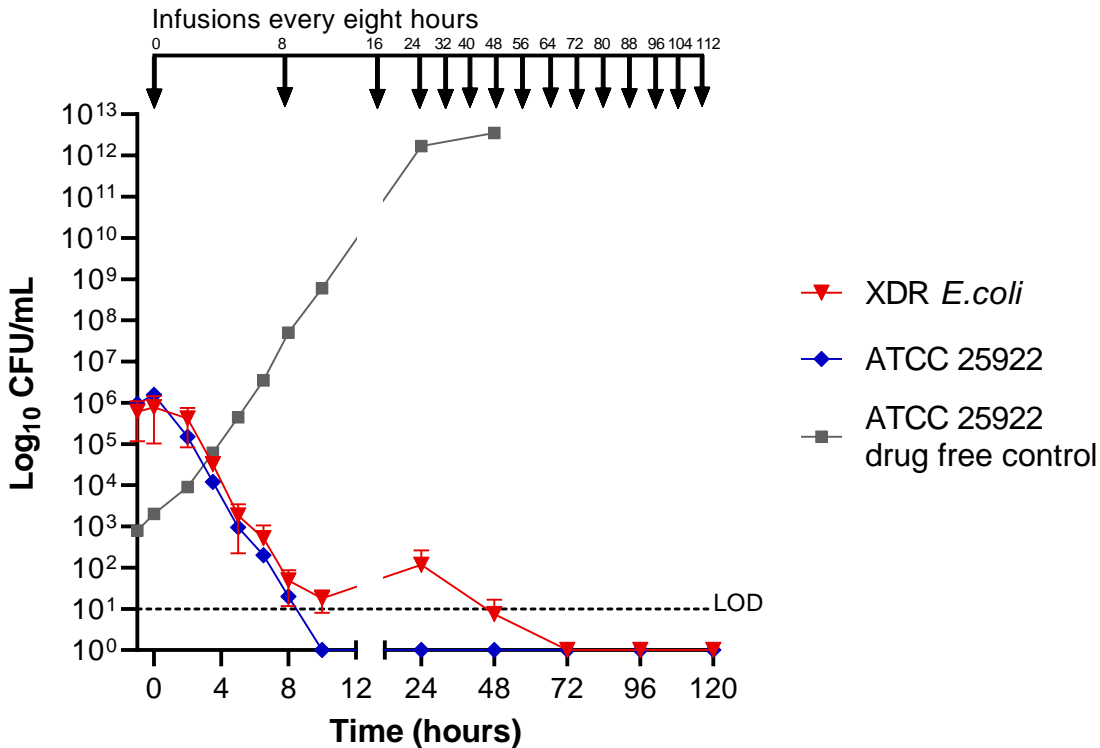

**Figure 1. XDR *E. coli* against Ceftazidime/Avibactam/Aztreonam combination regimen in HFIM.** Total bacterial population counts in CFU/mL over time. Data points for XDR *E. coli* (red) represent the geometric mean  $\pm$ SD of biological duplicates. Antibiotic infusions were dosed every 8 hours (shown in black at the top of the graph). The lower LOD for quantifying the bacteria was 10 CFU/mL, shown as black dashed line.
